# Supplementary material for: Transcription and Translation Products of the Cytolysin Gene psm-mec on the Mobile Genetic Element SCCmec Regulate Staphylococcus aureus Virulence
Source: PubMed Central journal article supplement (PMC3033363; doi:10.1371/journal.ppat.1001267), 2011-02-03
Supplement: ppat.1001267.s006.pdf [file ppat.1001267.s006.pdf]

**Table S1.** Summary of differentially expressed proteins between the F region-introduced Newman strain and the empty vector-introduced Newman strain.

| Molecular weight (kDa) |          | Protein predicted                                           | Peptides<br>mached | Sequence<br>coverage percent |
|------------------------|----------|-------------------------------------------------------------|--------------------|------------------------------|
| SDS-PAGE               | Database |                                                             |                    |                              |
| 7*                     | 4.5      | hypothetical protein MW1056,<br>PSM $\beta$ 1 (gi 21282785) | 3                  | 91                           |
| 94                     | 78**     | fibronectin binding protein A<br>precursor (gi 50234117)    | 54                 | 71                           |

The protein band stained with Coomassie brilliant blue was excised and digested in-gel with trypsin. Nanoscale capillary liquid chromatography-tandem mass spectrometry of in-gel digests was performed using a ThermoFisher LTQ Orbitrap XL. Database searching was performed using the Mascot search program ([www.matrixscience.com](http://www.matrixscience.com)). \*The molecular weight of the protein was determined using Tricine-buffered 16.5% sodium dodecyl sulfate polyacrylamide gel electrophoresis. \*\*The molecular weight was estimated from the amino acid sequence of mature FnbA [1].

1. Jonsson K, Signas C, Muller HP, Lindberg M (1991) Two different genes encode fibronectin binding proteins in *Staphylococcus aureus*. The complete nucleotide sequence and characterization of the second gene. *Eur J Biochem* 202: 1041-1048.
