# Supplementary material for: Transcription and Translation Products of the Cytolysin Gene psm-mec on the Mobile Genetic Element SCCmec Regulate Staphylococcus aureus Virulence
Source: PubMed Central journal article supplement (PMC3033363; doi:10.1371/journal.ppat.1001267), 2011-02-03
Supplement: ppat.1001267.s007.pdf [file ppat.1001267.s007.pdf]

**Table S2.** PCR primers used in the study.

| Purpose or target              | Primer      | Sequence (5'-3')                                      |
|--------------------------------|-------------|-------------------------------------------------------|
| plasmid construction           | KmF-SpeI    | CGGACTAGTCATCCATAGTTGCCTGACTCC                        |
|                                | KmR-XhoI    | CCGCTCGAGTCTAGGTACTAAAACAATTCATCCAG                   |
|                                | pND50F-SpeI | CGGACTAGTGGAGGCTTACTTGTCTGCTTTT                       |
|                                | pND50R-XhoI | CCGCTCGAGCCAGATCCGATTGCTGAATAA                        |
| primer extension<br><i>aph</i> | 5AA-F       | AAATCAATAATGCTTGTAATAACACCAGTG                        |
|                                | KmF         | AGCGAACCATTTGAGGTGAT                                  |
|                                | KmR         | GGGACCCCTATCTAGCGAAC                                  |
| <i>ermAM</i>                   | ErmF        | TTCGTCTTCAAGAATTGATCCTC                               |
|                                | ErmR        | TTCCAAATTTACAAAAGCGACTC                               |
| <i>psma</i>                    | psma-U-F    | ACGTGGCACTTTCCAAAAAC                                  |
|                                | psma-U-R    | GAGGATCAATTCTTGAAGACGAAGATTACCTCCTTTGCT<br>TATGAGT    |
|                                | psma-D-F    | GAGTCGCTTTTGTAATTTGGAAATTCTCAGGCCACTATA<br>CCAA       |
|                                | psma-D-R    | TCGTTCGATCAAAAAGGTATCG                                |
| <i>psmβ</i>                    | psma-C-F    | GGAGGATCCAGACACTGCATCACGGTACG                         |
|                                | psma-C-R    | GGTGGTACCGGCAAATTAGACCAGCACGA                         |
|                                | psmb-U-F    | GTACCTAAAAAGCCAGACATGAAAA                             |
|                                | psmb-U-R    | ATCACCTCAAATGGTTTCGCTGCGTAGCTTTTAAATCACCG<br>AAAT     |
|                                | psmb-D-F    | GTTTCGCTAGATAGGGGTCCCCTGCTAACGGTGTGGGTT<br>T          |
|                                | psmb-D-R    | GAAAAGCCCTGCTTGTTGTC                                  |
| <i>fnbA</i>                    | fnbA-F      | AAGAAGCTTGCTGCAGCATCAGAACAAAA                         |
|                                | fnbA-R      | GGAGGATCCCCTTGTCTGCATGAGGTT                           |
| <i>hfq</i>                     | hfq-U-F     | AACTCGCGAAGCGTATCAAT                                  |
|                                | hfq-U-R     | ATCACCTCAAATGGTTTCGCTTGCAATCATCTGTCCGACTC             |
|                                | hfq-D-F     | GTTTCGCTAGATAGGGGTCCCCTCATATGGGCACGATTTAA<br>TGA      |
|                                | hfq-D-R     | GAATTTGTTGCTGAGCCATGT                                 |
| shortening of the F region     | F           | GGAGGATCCTTACGTATTTCCAATATGACG                        |
|                                | F1          | TGACGATTTTTTATGCAAAG                                  |
|                                | F2          | TTTTTCAAATTTTTGACATTTATGCAATCT                        |
|                                | F3          | AAATAGCCAATTAGGGAATTTTTAAC                            |
|                                | F4          | TTTTTTATTTGTTTGATATTATACTTAATG                        |
|                                | F5          | CTTAATGTATCTTAAATAGAAAGAG                             |
|                                | R7          | TCAAACAAATAAAAAATGTTAAAAATTCCC                        |
|                                | R6          | TTCTATTTAAGATACATTAAGTATAATATC                        |
|                                | R2          | AAGAAGCTTGTAATAACACCAGTGAAATC                         |
|                                | R3          | AAGAAGCTTTTTTAGTTGAAAAAATTA                           |
|                                | R4          | AAGAAGCTTGTTTACAACAATACATAGA                          |
|                                | pM2         | M2-F                                                  |
| M2-R                           |             | TTCTATTTAAGATACATTAAGTGGGGGGTCAAACAAATA<br>AAAAATGTTA |
| pB1                            | TAA1-F      | CATACCCTCTTTCTATTTAAGATAAATTAAGTATAATATC<br>AAACAAATA |

|                     |                  |                                                        |
|---------------------|------------------|--------------------------------------------------------|
|                     | TAA1-R           | TATTTGTTTGATATTATACTTAATTTATCTTAAATAGAAA<br>GAGGGTATG  |
| pB2                 | TAA2-F           | ATTAAGTATAATATCAAACAAATATAAAATGTTAAAAAT<br>TCCCTAATTG  |
|                     | TAA2-R           | CAATTAGGGAATTTTTAACATTTTATATTTGTTTGATATT<br>ATACTTAAT  |
| pB3                 | TAA3-F           | TGTTAAAAATCCCTAATTGGCTAATTAGATTGCATAAAT<br>GTCAAAAAT   |
|                     | TAA3-R           | ATTTTTGACATTTATGCAATCTAATTAGCCAATTAGGGAA<br>TTTTTAACA  |
| pB4                 | TAA4-F           | GGCTATTTAGATTGCATAAATGTCTAAAATTTGAAAAAC<br>ATACAACGAC  |
|                     | TAA4-R           | GTCGTTGTATGTTTTTCAAATTTTAGACATTTATGCAATC<br>TAAATAGCC  |
| pC1                 | 3-F              | AGAAAGAGGGTATGCATATGGATTAAACTGGTGTATTATA<br>CAAGCATTAT |
|                     | 3-R              | ATAATGCTTGTAATAACACCAGTTTAATCCATATGCATA<br>CCCTCTTCT   |
| pC2                 | 4-F              | ATATGGATTTCACTGGTGTATTAAAGCATTATTGATT<br>AATCAAGAC     |
|                     | 4-R              | GTCTTGATTAATCAATAATGCTTTAAATAACACCAGTG<br>AAATCCATAT   |
| pC3                 | 5-F              | GTGTTATTACAAGCATTATTGATTAAATCAAGACTTGCAT<br>TCAGGCTTT  |
|                     | 5-R              | AAAGCCTGAATGCAAGTCTTGATTTAATCAATAATGCTT<br>GTAATAACAC  |
| pFP                 | onlyP-F          | GCATTTGGATAATTTTTTCAACTAAAAACAGAGGAAAT<br>ATTCAACGAC   |
|                     | onlyP-R          | TACTCCTGTAAAATCCATATGCATACCCTCTTCTATTTA<br>AGAT        |
|                     | onlyP-F1         | TAAAAACATGTATACAAGCATTGGATAATTTTTTCAACT<br>AAAAACAG    |
|                     | onlyP-R1         | TTAAATCTATTATTGAAGTAATTACTCCTGTAAAATCCAT<br>ATGCATACC  |
|                     | pnlyP-F2         | ATTACTTCAATAATAGATTTAATAAAAAACATGTATACAA<br>GCA        |
| pNDX1-F             | psm-mecRNA<br>-F | ATCTTAAATAGAAAGAGGGTATGCATATGG                         |
|                     | xyl-tet-R        | TATTTTAATTATACTCTATCAATGATAGAGTGTCAATATT<br>TTTTTTAG   |
| 16S rRNA            | 16SrRNAF         | CTGTGCACATCTTGACGGTA                                   |
|                     | 16SrRNAR         | TCAGCGTCAGTTACAGACCA                                   |
| <i>psm-mec</i> mRNA | psm-mecF         | GGATTTCACTGGTGTATTAC                                   |
|                     | psm-mecR         | CCGAAAGCCTGAATGCAAGT                                   |
|                     | psm-mecF2        | ATCTTAAATAGAAAGAGGGTATGC                               |
|                     | psm-mecR2        | GTCGTTGAATATTCCTCTGTTT                                 |
| <i>psma1-2</i> mRNA | psmaF            | TGGGTATCATCGCTGGCATC                                   |
|                     | psmaR            | TACTTACCAGTGAATTTCTC                                   |
| <i>psma3-4</i> mRNA | psmaF2           | ATGGAATTCGTAGCAAAATTATTC                               |
|                     | psmaR2           | GCGAAAATGTCGATAATTGCTT                                 |
| <i>hla</i> mRNA     | SA1007-F         | GGTGCAAATGTTTCGATTGG                                   |
|                     | SA1007-R         | CGAAGTCTGGTAAAACCCTGA                                  |
| <i>agrA</i> mRNA    | SA1844-F         | GCCCTCGCAACTGATAATCCT                                  |
|                     | SA1844-R         | ACCAACTGGGTCATGCTTACG                                  |

|                      |                   |                                |
|----------------------|-------------------|--------------------------------|
| RNAIII               | SAS065-F          | GAAGGAGTGTTTCAATGG             |
|                      | SAS065-R          | TAAGAAAATACATAGCACTGAG         |
| <i>sarS</i> mRNA     | SA0108-F          | CGAGAGAAAATTGCAGAACGTG         |
|                      | SA0108-R          | TGTGATTCACTTTGATCTGCAAGG       |
| <i>fnbA</i> mRNA     | <i>fnbA</i> -RT-F | GGGATGGGACAAGACAAAGA           |
|                      | <i>fnbA</i> -RT-R | GTTGTGCAGTTTGTGGTGCT           |
| <i>hu</i> probes     | hu-F              | GAAGAATTCTTGGACAAGGTGAATCAATGG |
|                      | hu-R              | CATGCCATGGGACATTCACCTCCTGAGGTT |
| <i>psmA</i> promoter | psmA-P-F          | GGTGGTACCAGACACTGCATCACGGTACG  |
|                      | psmA-P-R          | TCTTCTAGATTTAATGATGCCAGCGATGA  |

---
